# Supplementary material for: Defective nuclear import of Tpr in Progeria reflects the Ran sensitivity of large cargo transport
Source: PubMed Central journal article supplement — J Cell Biol. 2013 May 13;201(4):541–57. doi: 10.1083/jcb.201212117 (PMC3653351; doi:10.1083/jcb.201212117), 2013-05-13
Supplement: supp_jcb.201212117_JCB_201212117_sm.pdf [file supp_jcb.201212117_JCB_201212117_sm.pdf]

Snow et al., <http://www.jcb.org/cgi/content/full/jcb.201212117/DC1>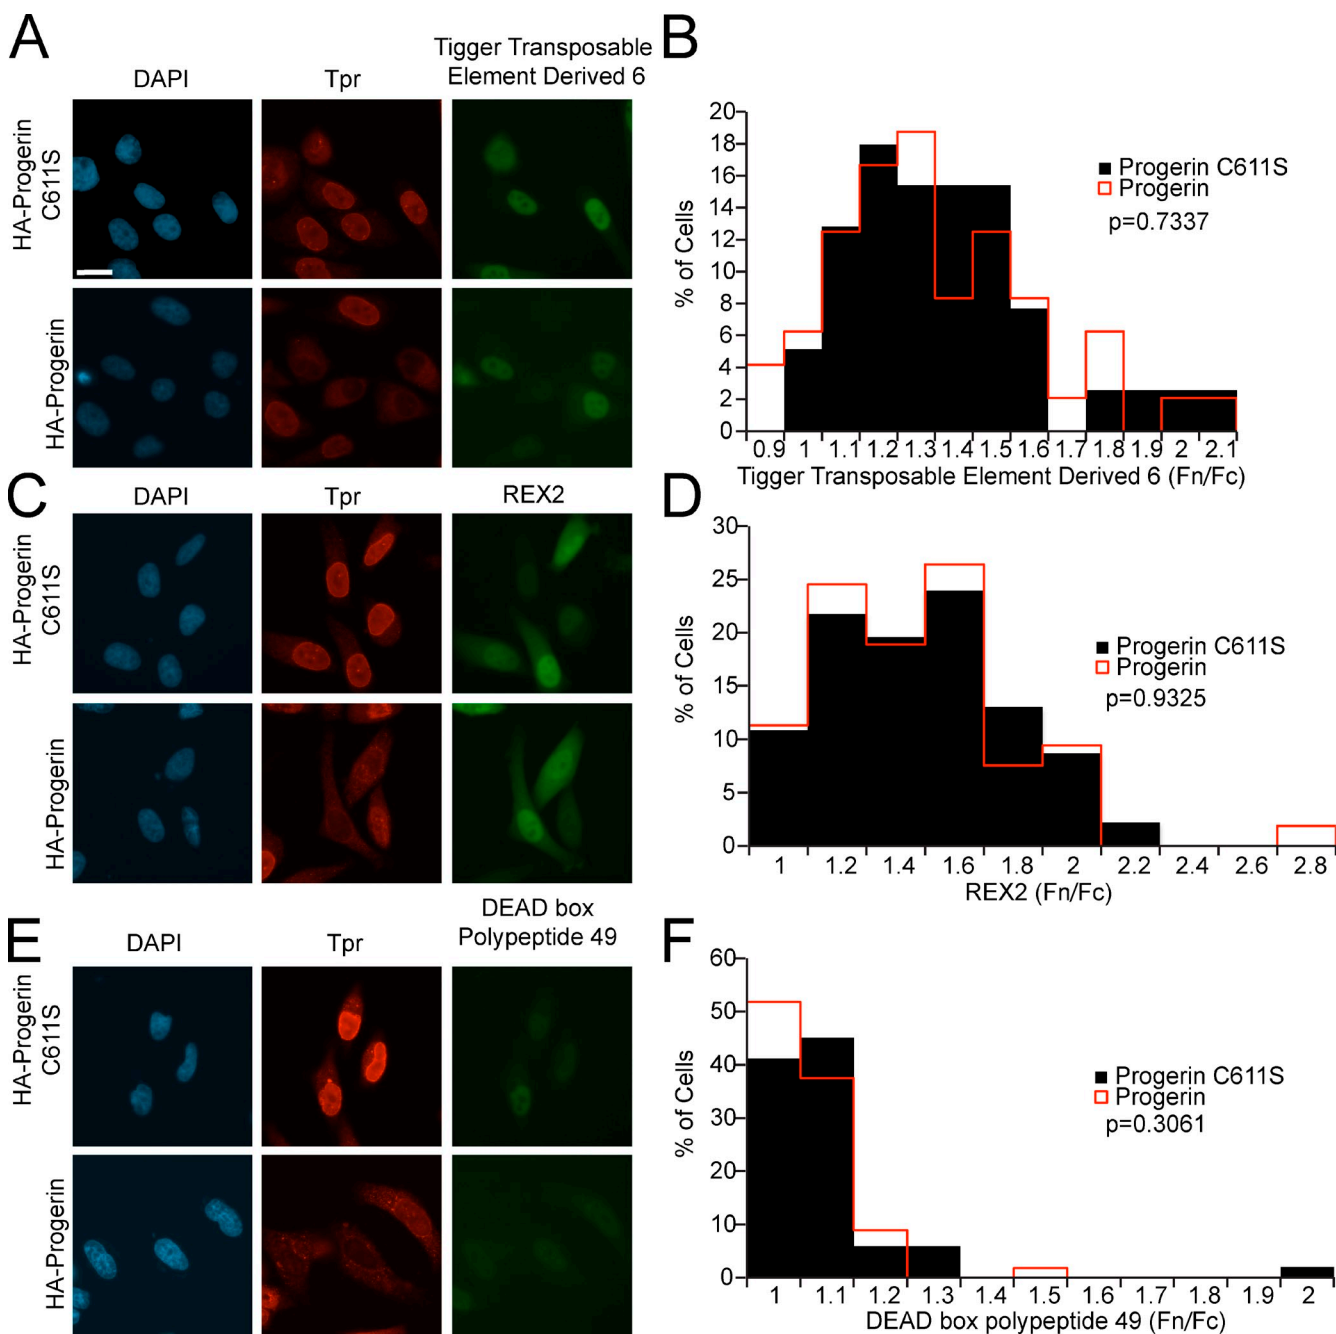

Figure S1. **Progerin does not inhibit nuclear localization of small cargoes.** IF microscopy and histograms of Fn/Fc levels of reporter proteins in HeLa cells transfected with Progerin. (A and B) YFP-tagged Tigger transposable element derived 6 cotransfected with HA-Progerin C611S ( $n = 39$ )– and HA-Progerin ( $n = 48$ )–transfected cells.  $P = 0.7337$ . (C and D) YFP-tagged REX2 cotransfected with HA-Progerin C611S ( $n = 46$ )– and HA-Progerin ( $n = 53$ )–transfected cells.  $P = 0.9325$ . (E and F) YFP-tagged DEAD box polypeptide 49 cotransfected with HA-Progerin C611S ( $n = 51$ )– and HA-Progerin ( $n = 56$ )–transfected cells.  $P = 0.3061$ . The IF microscopy in all panels is from a single experiment and is representative of at least two experiments. Bar, 20  $\mu\text{m}$ . Bar applies to all IF images.

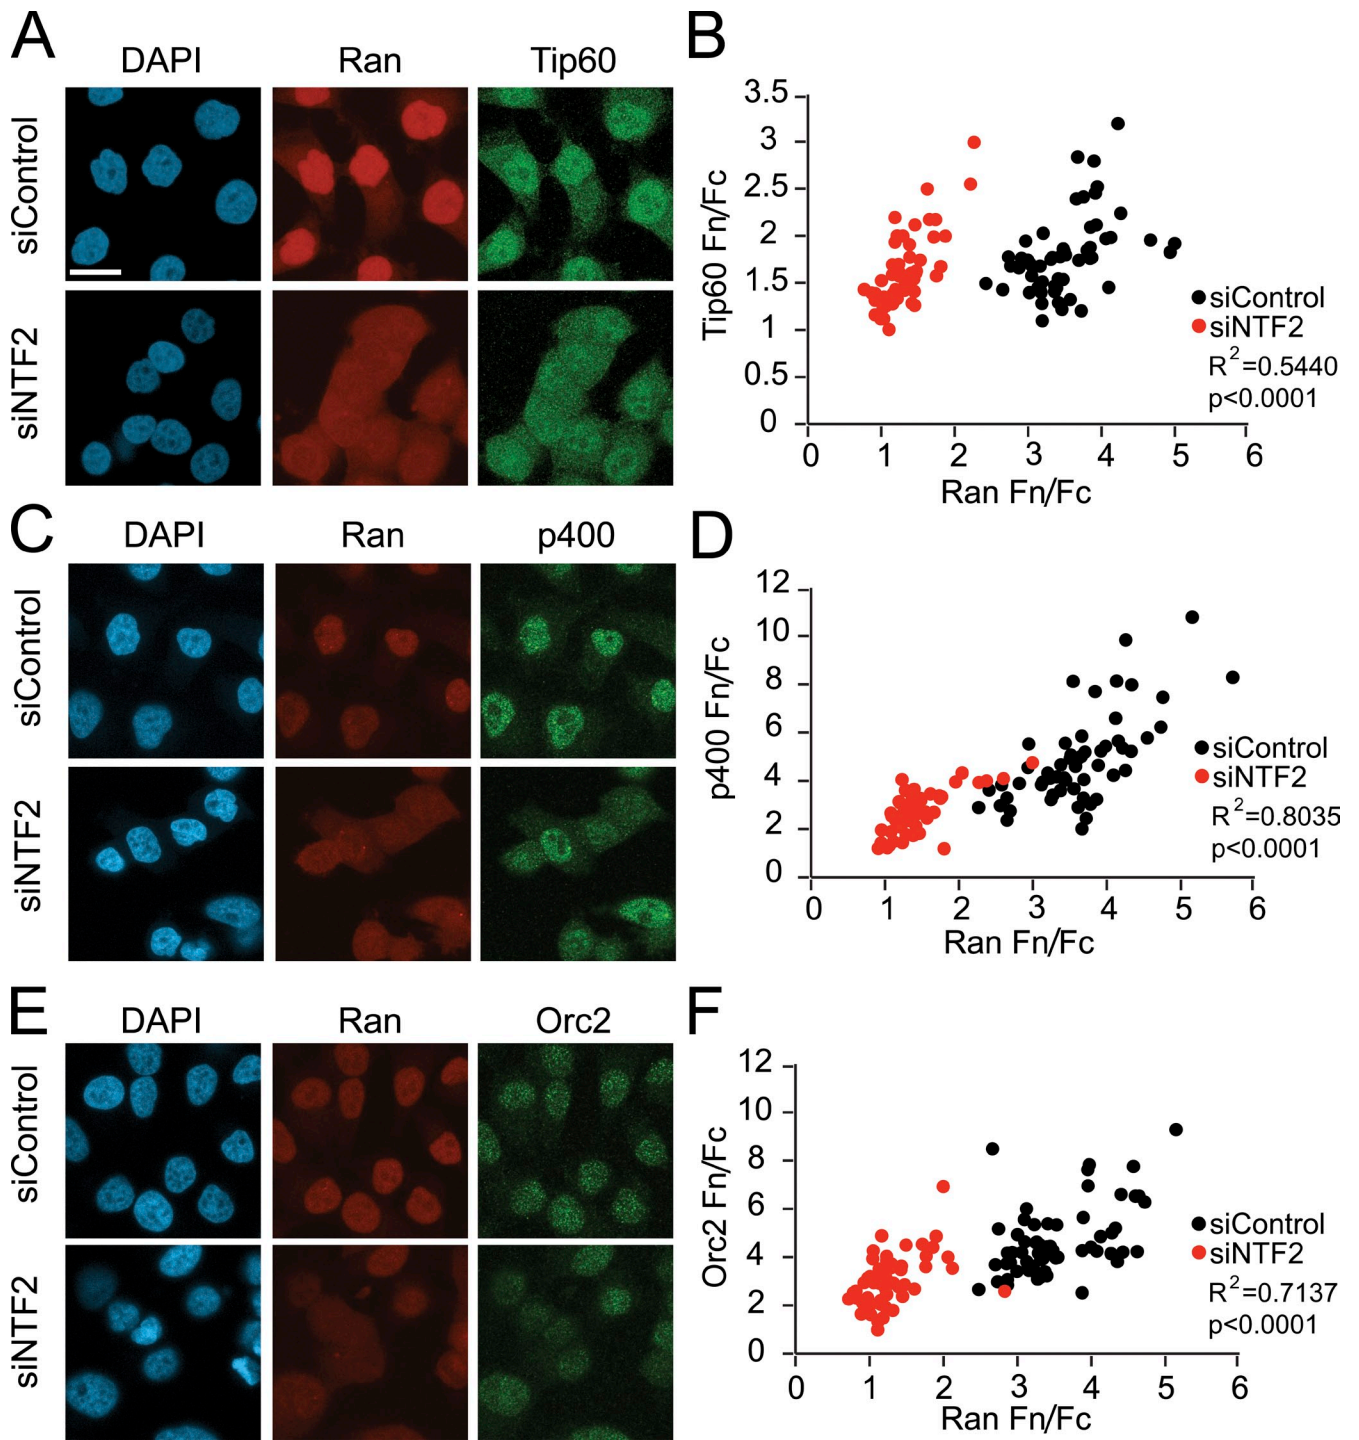

Figure S2. **Proteins that are part of large protein complexes depend on the Ran protein gradient for nuclear import.** HeLa cells were treated with NTF2 siRNA to disrupt the Ran gradient, and Fn/Fc values of the indicated proteins were plotted as a function of Ran Fn/Fc. (A and B) Tip60 in control siRNA (siControl;  $n = 59$ ) and siNTF2 cells ( $n = 56$ ). Spearman  $P < 0.0001$  for collated control siRNA and siNTF2 data. (C and D) p400 in control siRNA ( $n = 58$ ) and siNTF2 cells ( $n = 52$ ). Spearman  $P < 0.0001$  for collated control siRNA and siNTF2 data. (E and F) Orc2 in control siRNA ( $n = 67$ ) and siNTF2 cells ( $n = 54$ ). Spearman  $P < 0.0001$  for collated control siRNA and siNTF2 data. All data are representative of two experiments. Bar, 20  $\mu\text{m}$ . Bar applies to all IF images.

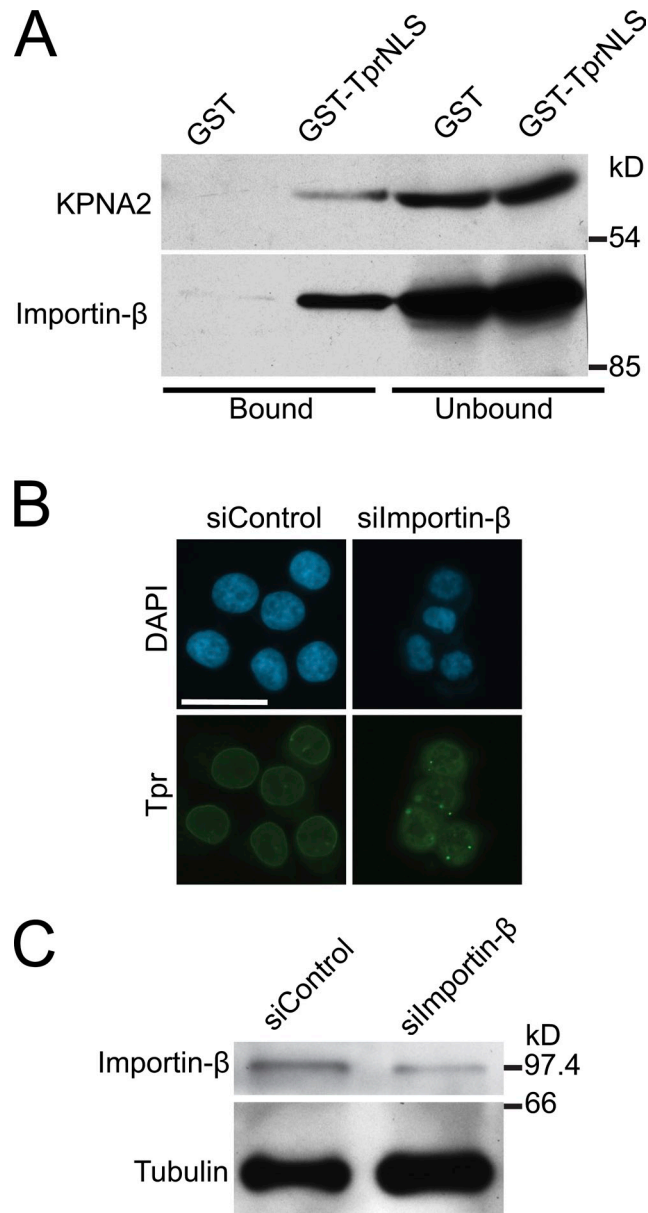

Figure S3. **Importin- $\beta$  mediates Tpr import.** (A) GST pull-down assay with reticulocyte lysate using immobilized GST and GST-TprNLS. KPNA2 and Importin- $\beta$  were detected by immunoblotting. (B) IF microscopy for endogenous Tpr in cells treated with siRNA to reduce Importin- $\beta$  levels. Bar, 20  $\mu$ m. (C) Immunoblotting of siRNA-treated cells. The gel sample from cells treated with siRNA to Importin- $\beta$  was overloaded to help estimate knockdown levels. siControl, control siRNA.

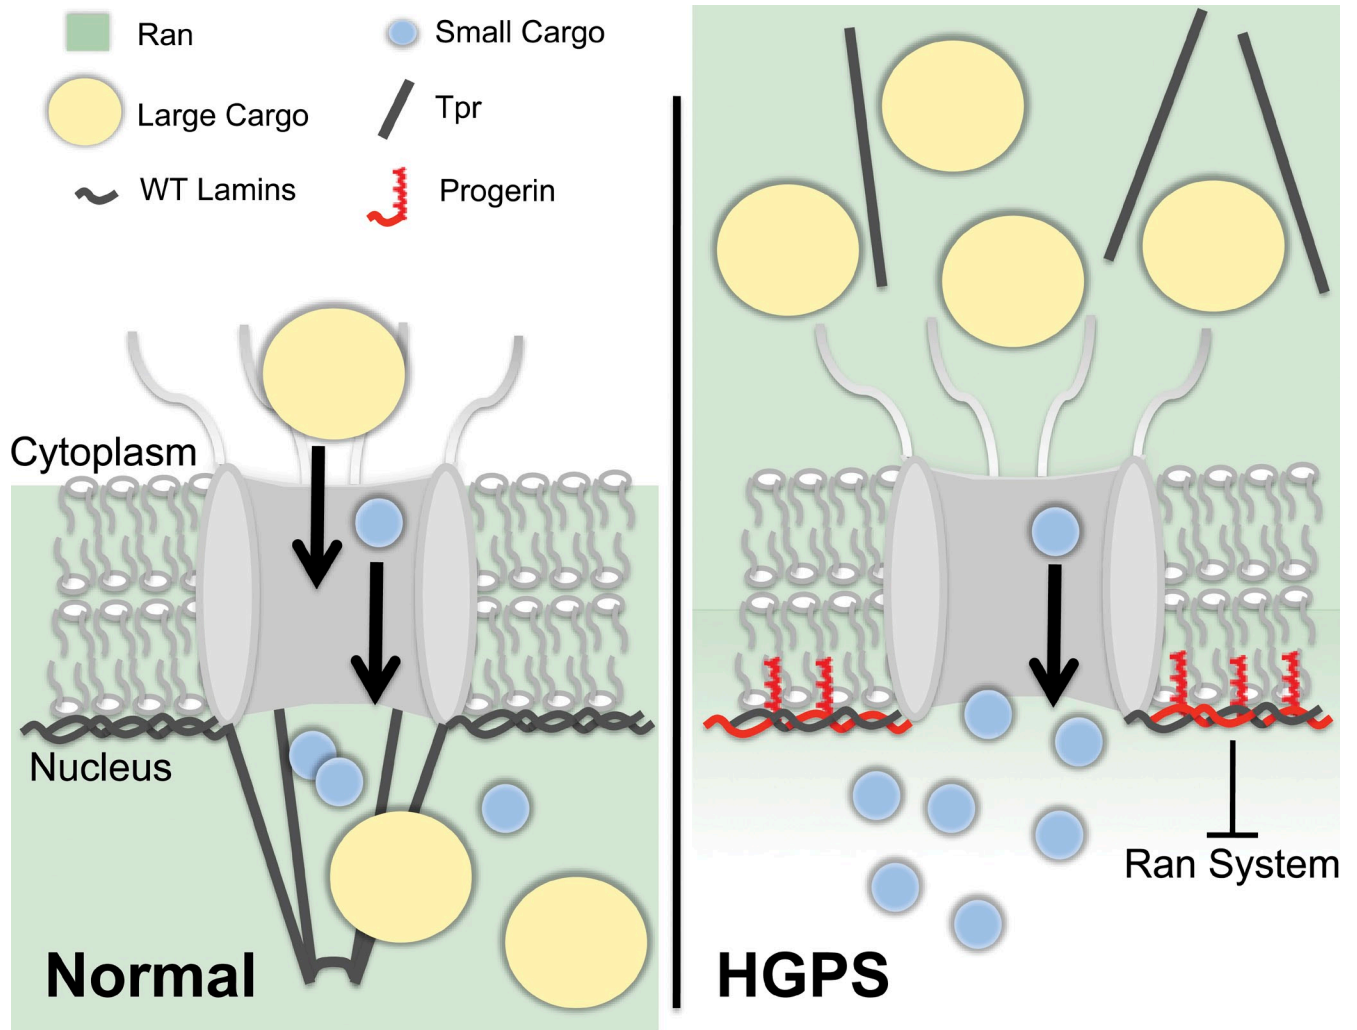

Figure S4. **Model of Progerin effects on nuclear import.** In normal cells (left), the Ran protein gradient (green) facilitates the nuclear import of Tpr and other large protein cargoes. In HGPS, Progerin that is constitutively anchored to the nuclear envelope is transduced as a dominant-negative effect on the Ran system, resulting in disruption of the F<sub>n</sub>/F<sub>c</sub> Ran protein gradient and defective import of Tpr and other large cargoes. Nuclear levels of Ran in HGPS cells are sufficient for small cargo import. WT, wild type.

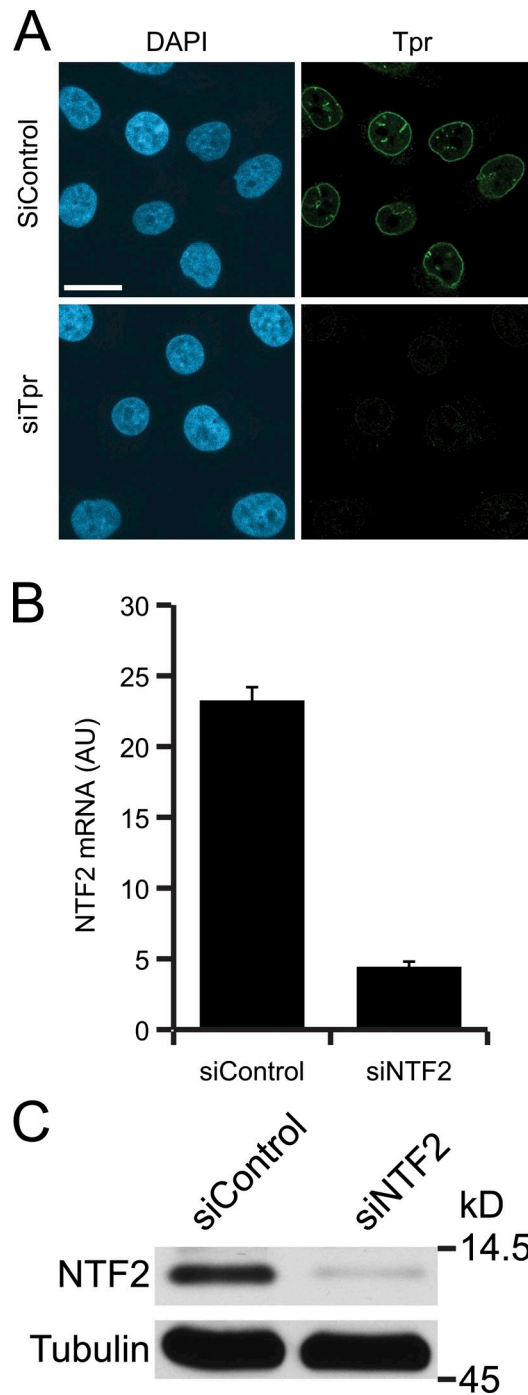

Figure S5. **Tpr-specific antibody and NTF2 knockdown.** (A) A recombinant fragment of Tpr (amino acids 1,649–1,912) was used as the immunogen and for affinity purification. Depletion of Tpr by siRNA reduces antibody signal by IF microscopy, indicating it is specific for Tpr. Bar, 20  $\mu$ m. (B) NTF2 transcript levels in control and NTF2-depleted HeLa cells determined by RT-PCR. Error bars represent the standard deviation of duplicate wells. (C) NTF2 protein levels in control and NTF2-depleted HeLa cells determined by immunoblotting. AU, arbitrary unit; siControl, control siRNA.

Table S1. Reporter proteins used in this study

| Protein                                                             | ID             | NCBI protein accession number | Tag   | Localization        | Affected by Progerin | Size            | Citation                               |
|---------------------------------------------------------------------|----------------|-------------------------------|-------|---------------------|----------------------|-----------------|----------------------------------------|
| pdEGFP-GST-NLS                                                      |                |                               | 2xGFP | N                   | No                   | 76 <sup>a</sup> | Obtained from S. Neimanis <sup>b</sup> |
| p(EGFP)3-Rev-NLS                                                    |                |                               | 3xGFP | N + nucleoli        |                      | 79 <sup>a</sup> | Obtained from S. Hutten <sup>c</sup>   |
| pGFP <sub>2</sub> -Jun                                              |                |                               | 2xGFP | N > C, N = C        | No                   | 37              | Obtained from I. Waldmann <sup>d</sup> |
| Rev-NES-GFP <sub>2</sub> -cNLS                                      |                |                               | 2xGFP | N > C, N = C        | No                   | 80 <sup>a</sup> | Hutten et al., 2008                    |
| Negative cofactor 2 (NC2-β)                                         |                | NP_001929.1                   |       | N = C, C > N        | No                   | 20              | Kahle et al., 2009                     |
| Telomerase                                                          | NM198253.2     | NP_937983.2                   | GFP   | N > C               | No                   | 126             |                                        |
| SIRT                                                                | OMIM604479     | NP_001135970.1                | GFP   | N                   | No                   | 82              |                                        |
| Caspase                                                             | OMIM147678     | NP_001214                     | GFP   | N = C               | No                   | 60              |                                        |
| Nmd3                                                                | NM015938.3     | NP_057022                     | GFP   | N = C               | No                   | 55              |                                        |
| SRY (sex determining region Y)-box 6                                | DKFZp434N1217  | AL136780                      | YFP   | N + Dots            | No                   | 92              |                                        |
| Tigger transposable element derived 6                               | DKFZp761E2110  | NP_112215                     | YFP   | N > C               | No                   | 59              |                                        |
| Cyclin D1                                                           | IMAGp958K23187 | AAH01501                      | YFP   | N = C, C > N        | No                   | 32              |                                        |
| DNA polymerase-transactivated protein 6                             | IRAU969E0476   | AAH18736                      | YFP   | C > N               | No                   | 61              |                                        |
| Zinc finger and BTB domain-containing 33                            | DKFZp686J23115 | CAD98016                      | YFP   | N > C               | No                   | 74              |                                        |
| MIS12 homolog (yeast)                                               | DKFZp434I209   | CAB66840                      | YFP   | N>, N = C + Dots    | No                   | 24              |                                        |
| Deleted in breast cancer gene-1 protein (DBC1)                      | NM199205       | NP_954675                     | GFP   | N > C, N = C        | No                   | 103             |                                        |
| DEAD (Asp-Glu-Ala-Asp) box polypeptide 43                           | DKFZp434H2114  | AAH66938                      | CFP   | N = C, C > N        | No                   | 73              |                                        |
| DEAD (Asp-Glu-Ala-Asp) box polypeptide 59                           | DKFZp564B1023  | CAB66546                      | YFP   | N > C               | No                   | 69              |                                        |
| Upstream transcription factor 1                                     | DKFZp686K19103 | CAL38711                      | YFP   | N                   | No                   | 34              |                                        |
| DNA methyltransferase 1-associated protein 1                        | DKFZp564C0464  | CAB66592                      | CFP   | N                   | No                   | 53              |                                        |
| KIAA1967                                                            | DKFZp761I2217  | CAD39016                      | CFP   | N, N = C            | No                   | 103             |                                        |
| RAD17 homolog ( <i>Schizosaccharomyces pombe</i> )                  | DKFZp434A1135  | CAB59244                      | CFP   | N = C               | No                   | 77              |                                        |
| NUAK family, SNF1-like kinase, 2                                    | DKFZp434J037   | CAB66825                      | CFP   | N + Dots            | No                   | 74              |                                        |
| KIAA1387 protein                                                    | DKFZp761I0112  | CAB66491                      | CFP   | N                   | No                   | 93              |                                        |
| REX2, RNA exonuclease 2 homolog ( <i>Saccharomyces cerevisiae</i> ) | DKFZp566E144   | NP_056338                     | YFP   | N > C, N = C        | No                   | 27              |                                        |
| mSin3A-associated protein 130                                       | DKFZp434A112   | NP_078821.2                   | YFP   | N                   | No                   | 130             |                                        |
| Zinc finger and BTB domain-containing 20                            | DKFZp566F123   | CAB43377                      | YFP   | N + Dots            | No                   | 81              |                                        |
| Chondroitin polymerizing factor                                     | DKFZp434E0423  | CAB66748                      | YFP   | N = C, C > N + Dots | No                   | 85              |                                        |
| Tuftelin-interacting protein 11                                     | DKFZp434B194   | CAB45740                      | YFP   | N + Dots            | No                   | 96              |                                        |
| HSPC065 protein                                                     | DKFZp434N1418  | CAB66719                      | YFP   | N                   | No                   | 44              |                                        |
| Cleavage- and polyadenylation-specific factor 3-like                | DKFZp434A1923  | CAB66747                      | YFP   | N > C, N = C        | No                   | 68              |                                        |
| Unc-84 homolog B ( <i>Caenorhabditis elegans</i> )                  | DKFZp686F10107 | CAD97926                      | YFP   | Rim of N            | No                   | 85              |                                        |
| Hypothetical protein DKFZp564O0523                                  | DKFZp564O0523  | CAG38580                      | YFP   | N                   | No                   | 42              |                                        |

N, nucleus; C, cytoplasm.

<sup>a</sup>Sizes are exclusive of tags except where noted.

<sup>b</sup>Zentrum für Biochemie und Molekulare Zellbiologie, Göttingen, Germany.

<sup>c</sup>Zentrum für Biochemie und Molekulare Zellbiologie, Göttingen, Germany.

<sup>d</sup>Georg-August-University of Göttingen, Göttingen, Germany.

## References

- Hutten, S., A. Flotho, F. Melchior, and R.H. Kehlenbach. 2008. The Nup358-RanGAP complex is required for efficient importin alpha/beta-dependent nuclear import. *Mol. Biol. Cell.* 19:2300–2310. <http://dx.doi.org/10.1091/mbc.E07-12-1279>
- Kahle, J., E. Piaia, S. Neimanis, M. Meisterernst, and D. Doenecke. 2009. Regulation of nuclear import and export of negative cofactor 2. *J. Biol. Chem.* 284:9382–9393. <http://dx.doi.org/10.1074/jbc.M805694200>
